# Supplementary material for: Perspective on ice age terminations from absolute chronologies provided by global speleothem records
Source: Copernicus journal article supplement (doi:10.5194/cp-21-1633-2025), 2025-09-15
Supplement: Supplementary file 1 [file cp-21-1633-2025-supplement.pdf]

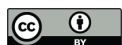

## *Supplement of*

# **Perspective on ice age terminations from absolute chronologies provided by global speleothem records**

**Nikita Kaushal et al.**

*Correspondence to:* Nikita Kaushal ([nikitageologist@gmail.com](mailto:nikitageologist@gmail.com))

The copyright of individual parts of the supplement might differ from the article licence.

## Supplementary Information

**Table S1:** Further information of speleothem entities that were not analysed as a part of the main manuscript since they only partially cover Terminations or have lower resolution or U-Th dates with larger errors than the records used in the main manuscript. Cave site locations are plotted in Fig. S1 and time series plots are in Fig. S2. Some data from the main manuscript are included in the table and plots to enable comparison.

| region        | site name      | latitude | longitude | elev. (m) | entity name             | age model                   | citation                  | primary interpretation                           | secondary interpretation                                       | comments                                                                                                 |
|---------------|----------------|----------|-----------|-----------|-------------------------|-----------------------------|---------------------------|--------------------------------------------------|----------------------------------------------------------------|----------------------------------------------------------------------------------------------------------|
| South Europe  | Corchia        | 43.9833  | 10.2167   | 840       | CC-5_2018               | SISAL-Bchron                | Tzedakis et al., 2018     | rainfall amount                                  | source water composition                                       |                                                                                                          |
|               |                |          |           |           | CC-1_2018               | SISAL-copRa                 | Tzedakis et al., 2017     | rainfall amount                                  | source water composition                                       |                                                                                                          |
|               | Soreq          | 31.7558  | 35.0226   | 400       | Soreq_composite (green) | author-linear between dates | Bar-Matthews et al., 2003 | rainfall amount                                  | source water composition                                       | composite includes stalactites;                                                                          |
|               | Jerusalem West | 31.7833  | 35.15     | 700       | AF12 (blue)             | author-polynomial fit       | Frumkin et al., 1999      | source water composition                         | change in moisture transport trajectory and linked seasonality | age reversals beyond 100k; calcite precipitation T and ice volume source composition                     |
|               | La Vallina     | 43.4100  | -4.8067   | 70        | Garth                   | author-mixed Bchron         | Stoll et al., 2022        | source water composition                         | temperature dependency of meteoric precipitation               | confocal band counting                                                                                   |
| North Europe  | Villars        | 45.43    | 0.78      | 175       | Vil-car1                | author-linear between dates | Wainer et al., 2011       | cave air temperature                             | disequilibrium                                                 | flowstone; authors flag possible detrital contamination and U-leaching giving older ages,                |
|               | Abaliget       | 46.1333  | 18.1167   | 209       | ABA_1                   | author-StalAge              | Koltai et al., 2017       | temperature dependency of meteoric precipitation | source water composition                                       | flowstone; author generated age model uses both cores to create master chronology                        |
|               | Schneckenloch  | 47.4333  | 9.8667    | 1285      | SCH-5                   | SISAL-copRa                 | Moseley et al., 2015      | temperature dependency of meteoric precipitation | change in moisture transport trajectory                        |                                                                                                          |
|               | Sieben Hengste | 46.75    | 7.81      | 1955      | 7H-12                   | author-StalAge              | Luetscher et al., 2021    | temperature dependency of meteoric precipitation | change in moisture transport trajectory                        |                                                                                                          |
|               | Neotektonik    | 46.7833  | 8.2666    | 1700      | M37-1-16A               | author-OxCal                | Wilcox et al., 2020       |                                                  |                                                                | paper focused on fluid inclusions, no $\delta^{18}\text{O}$ interpretations provided; no reported hiatus |
| North America | Lehman caves   | 39.01    | -114.22   | 2080      | LMC-14                  | SISAL-copRa                 | Lachniet et al., 2014     | temperature dependency of meteoric precipitation | change in moisture source latitude                             |                                                                                                          |
|               |                |          |           |           | LMC-21                  | SISAL-copRa                 | Lachniet et al., 2014     | temperature dependency of meteoric precipitation | change in moisture source latitude                             |                                                                                                          |
|               |                |          |           |           | LC-2                    | SISAL-Bchron                | Shakun et al., 2011       |                                                  |                                                                |                                                                                                          |
|               | Devils Hole    | 36.4254  | -116.2915 | 719       | DH2-D                   | author-OxCal                | Moseley et al., 2016      | temperature dependency of meteoric precipitation | change in seasonality                                          | sub-aqueous calcite; shallowest core with least $^{230}\text{Th}$ effect and youngest chronologies       |

|                     |                  |         |          |      |               |                             |                           |                                                                       |                                                                |                                                                                   |
|---------------------|------------------|---------|----------|------|---------------|-----------------------------|---------------------------|-----------------------------------------------------------------------|----------------------------------------------------------------|-----------------------------------------------------------------------------------|
| <b>EASM</b>         | Dongge           | 25.2833 | 108.0833 | 680  | D4_2005_Kelly | author-unknown              | Kelly et al., 2006        | change in seasonality                                                 | upstream rainout                                               |                                                                                   |
|                     |                  |         |          |      | D8            | SISAL-copRa                 | Kelly et al., 2006        | change in seasonality                                                 | upstream rainout                                               |                                                                                   |
|                     | Sanbao           | 31.667  | 110.4333 | 1900 | SB11          | sisal-copRa                 | Cheng et al., 2016b       | upstream rainout                                                      | change in seasonality                                          |                                                                                   |
|                     |                  |         |          |      | SB23          | sisal-copRa                 | Cheng et al., 2016b       | upstream rainout                                                      | change in seasonality                                          |                                                                                   |
|                     |                  |         |          |      | SB25-2        | sisal-copRa                 | Cheng et al., 2016b       | upstream rainout                                                      | change in seasonality                                          |                                                                                   |
|                     |                  |         |          |      | SB41          | sisal-copRa                 | Cheng et al., 2016b       | upstream rainout                                                      | change in seasonality                                          |                                                                                   |
| <b>South Europe</b> | Sofular          | 41.4167 | 31.9333  | 440  | SO-4          | SISAL-Bchron                | Badertscher et al., 2011  | source water composition                                              |                                                                | more negative from Caspian Sea with melt waters, more positive from Mediterranean |
|                     | Crovassa Azzurra | 39.28   | 8.48     | 410  | CA            | author-linear between dates | Columbu et al., 2019      | rainfall amount                                                       | change in moisture source                                      | flowstone; mixed mineralogy-aragonite with some calcite                           |
|                     | Peqiin cave      | 32.58   | 35.19    | 650  | PEK_composite | author-unknown              | Bar-Matthews et al., 2003 | rainfall amount                                                       | source water composition                                       | composite includes stalactites                                                    |
|                     | Ejulve           | 40.76   | -0.59    | 1240 | ARTEMISA      | author-StalAge and other    | Pérez-Mejías et al., 2017 | temperature change                                                    | source water composition                                       | record focuses on $\delta^{13}\text{C}$ as proxy for dry conditions               |
| <b>Central Asia</b> | Kesang           | 42.87   | 81.75    | 2000 | KS06-A        | SISAL-copRa                 | Cheng et al., 2016a       | large-scale circulation and supra-regional climate                    | change in moisture transport trajectory and linked seasonality | temperature effect on calcite precipitation                                       |
|                     | Kesang           | 42.87   | 81.75    | 2000 | KS08-1        | SISAL-copRa                 | Cheng et al., 2016a       | large-scale circulation and supra-regional climate                    | change in moisture transport trajectory and linked seasonality | temperature effect on calcite precipitation                                       |
| <b>ISM</b>          | Xiaobailong      | 24.2    | 103.36   | 1500 | XBL-26        | SISAL-copRa                 | Cai et al., 2015          | rainfall amount                                                       |                                                                |                                                                                   |
|                     | Bittoo           | 30.7903 | 77.7764  | 3000 | BT-9          | sisal-Bchron                | Kathayat et al., 2016     | large-scale circulation, upstream changes, moisture transport history |                                                                |                                                                                   |

**Figure S1:** Plots of speleothem entities that were not analysed as a part of the main manuscript since they only partially cover Terminations or have lower resolution or U-Th dates with larger errors than the records used in the main manuscript or are composite records. Key plots from the main manuscript have also been shown in these supplementary figures for comparison. Ages covering Terminations in kilo years before 1950 (ky BP) are plotted against oxygen isotopic measurements in ‰. The direction of the Y axis for each figure has been selected so that up points to warmer or wetter climates. Age-depth model uncertainties where available are plotted as grey shading on the proxy plots. U-Th dates and dating uncertainties have been plotted below the proxy plots. Insolation curves in  $\text{Wm}^{-2}$  are plotted in sub-figures ‘(a)’ of each of the Termination figures and are the summer half year caloric insolation as provided in Tzedakis et al, 2017. This metric for insolation was selected because it accounts for the effect of both precession and obliquity on northern latitude insolation. Cave sites are shown on maps in Fig.1 and further record information can be found in Table S1. Since a large number of records are available for Termination II, separate plot sections have been made for North Europe, North America and the monsoon records respectively.

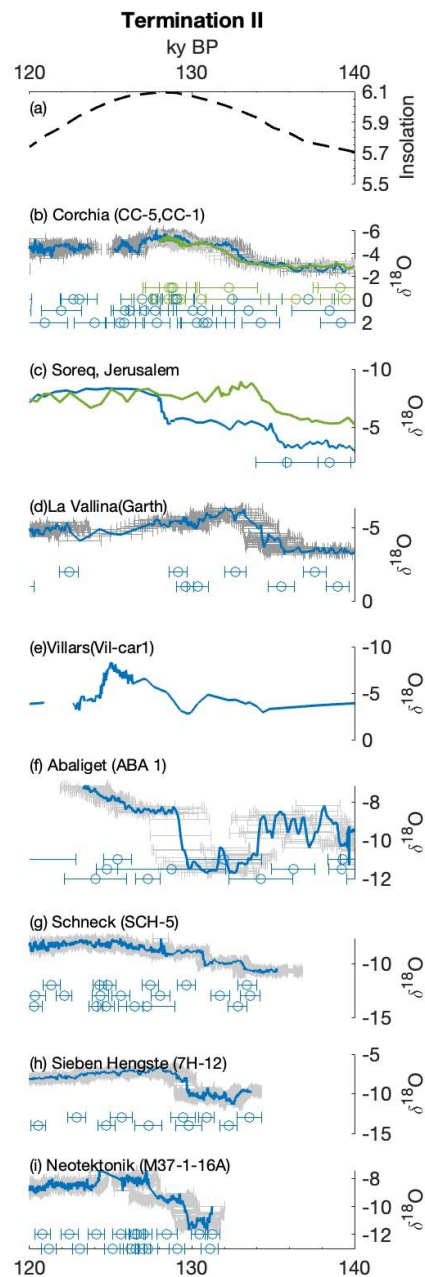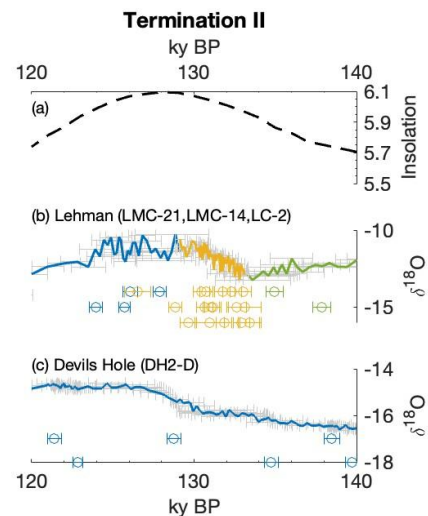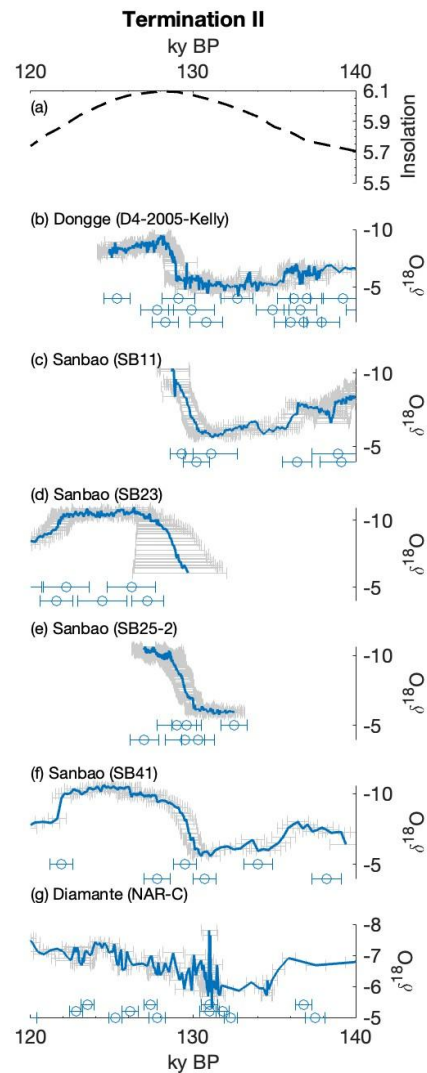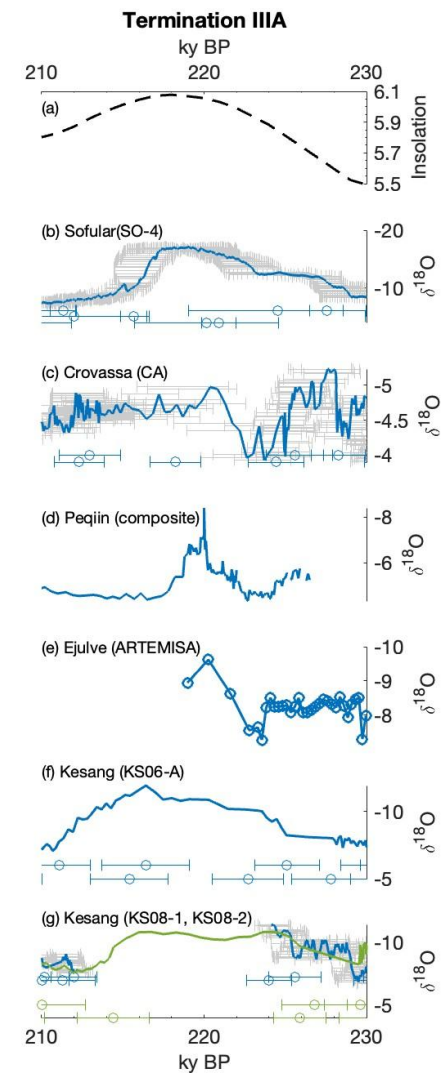

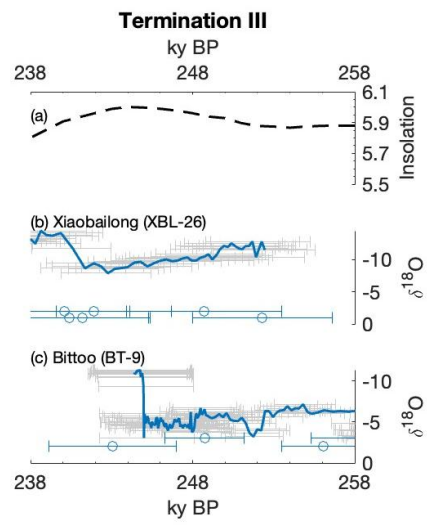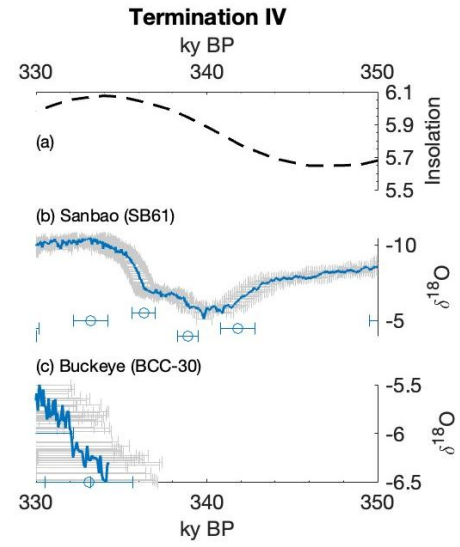

**Figure S2:** Ages covering Terminations are plotted against **(a)** insolation, **(b)** sea level curves and **(c)** the ice volume effects on seawater oxygen isotopic records. Insolation curves in  $\text{Wm}^{-2}$  are plotted in sub-figures ‘(a)’ of each of the Termination figures and are the summer half year caloric insolation as provided in Tzedakis et al, 2017. This metric for insolation was selected because it accounts for the effect of both precession and obliquity on northern latitude insolation. The Spratt and Lisiecki sea level curve is based on orbital tuning, and the Grant sea level curve is based on tuning to millennial dust events in the Red Sea. These two curves exhibit difference in timing and amplitude of sea level rise during Terminations and this is shown in the figures. The benthic derived Waelbroeck sea level curve has a lower resolution and has not been used for further calculations but has also been plotted here. A value of  $0.00833 \text{ ‰} / \text{m}$  of relative sea level has been used to calculate the global average change in  $\delta^{18}\text{O}_{\text{seawater}}$ . For Termination II, the North Iberian Speleothem Archive (NISA) record is superimposed over the global curves to showcase the impact of regional North Atlantic changes in sea water  $\delta^{18}\text{O}$  compared to the global curves.

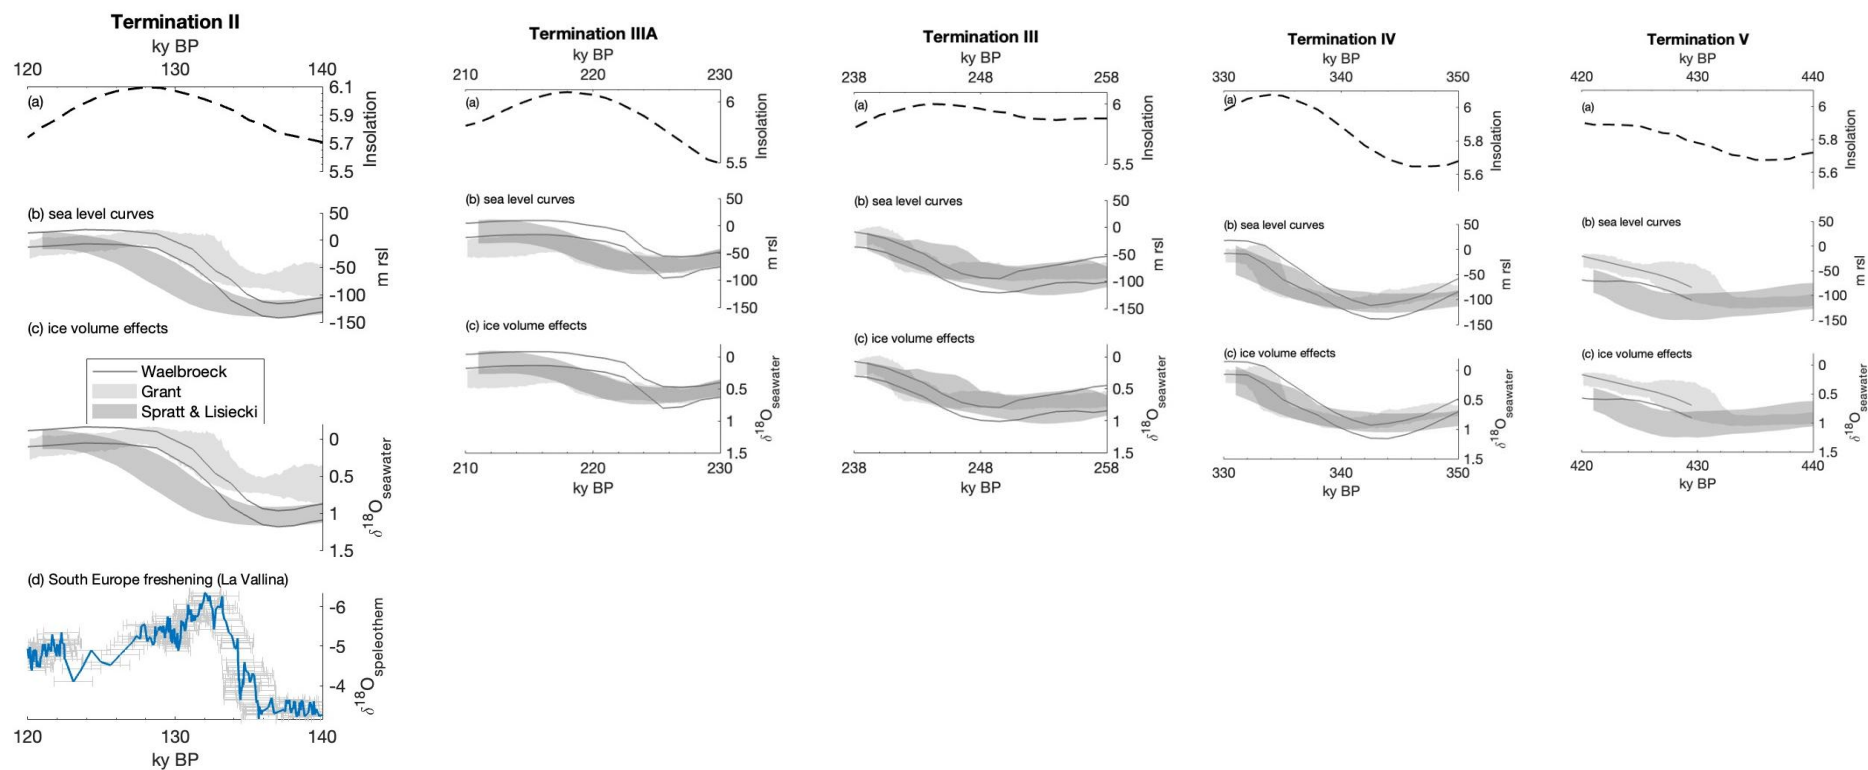



**Figure S3:** Ages covering Terminations are plotted against the ice volume effects on speleothem oxygen isotopic records. Insolation curves in  $\text{Wm}^{-2}$  are plotted in the first sub-figures at the top of each Termination plot and are the summer half year caloric insolation as provided in Tzedakis et al, 2017. This metric for insolation was selected because it accounts for the effect of both precession and obliquity on northern latitude insolation. The Spratt and Lisiecki sea level curve is based on orbital tuning, and the Grant sea level curve is based on tuning to millennial dust events in the Red Sea. These two curves exhibit difference in timing and amplitude of sea level rise during Terminations and this is shown in the figures. For Termination II, the North Iberian Speleothem Archive (NISA) record is superimposed over the Europe speleothem data to showcase the impact of regional North Atlantic changes in sea water  $\delta^{18}\text{O}$  compared to the global curves.

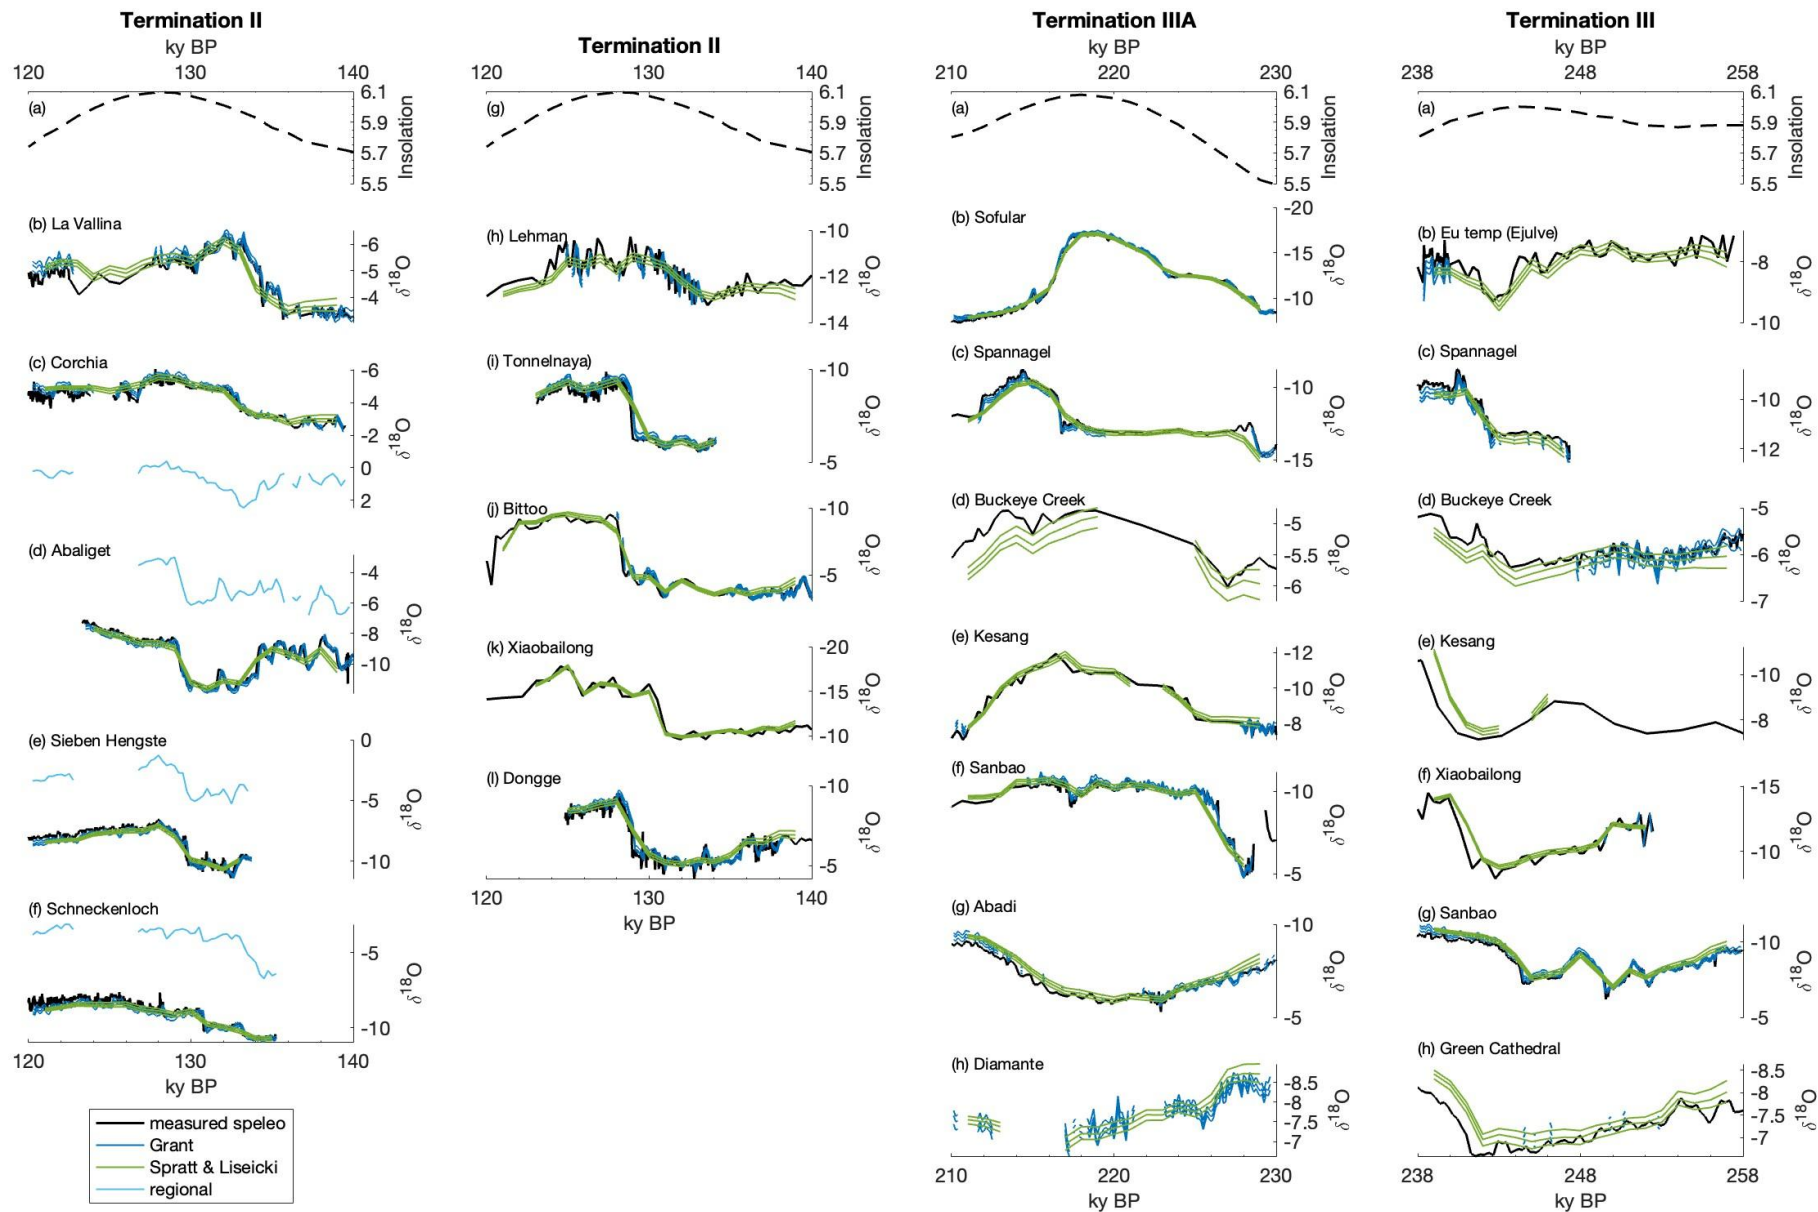

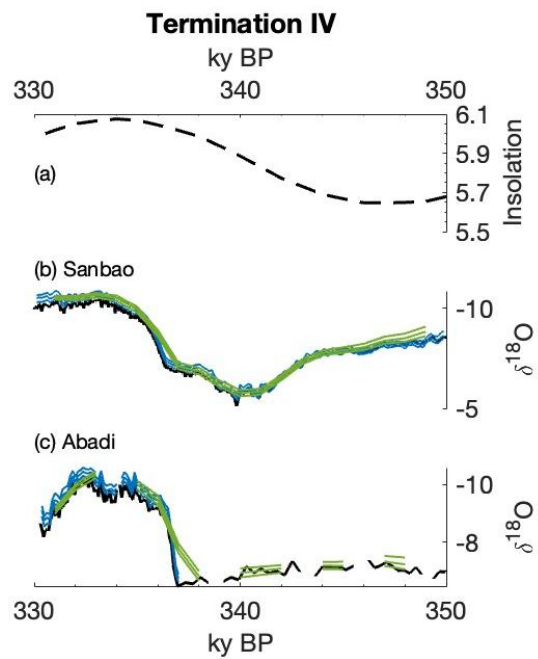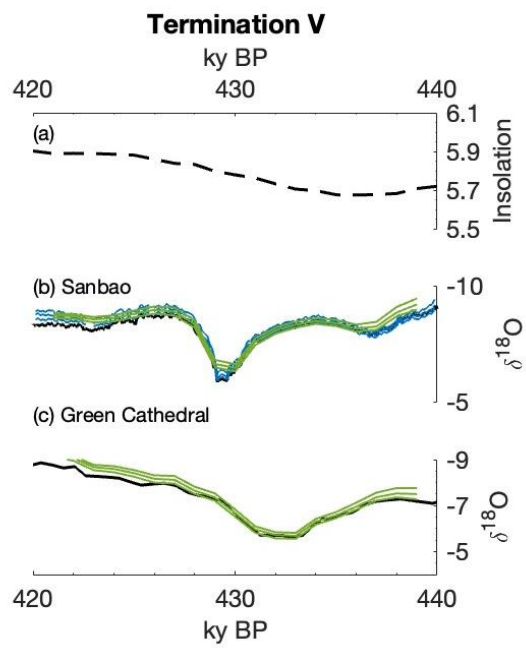

**Figure S4:** Ages covering Terminations for the South European records from La Vallina and Ejulve caves are plotted against measured  $\delta^{13}\text{C}$ , degassing corrected  $\delta^{13}\text{C}$  ( $\delta^{13}\text{C}_{\text{corr}}$ ) and Mg/Ca records. The  $\delta^{13}\text{C}_{\text{corr}}$  values are derived from an index based on the Mg/Ca data providing  $\delta^{13}\text{C}$  'initial' values that give temperature information.

### Termination II

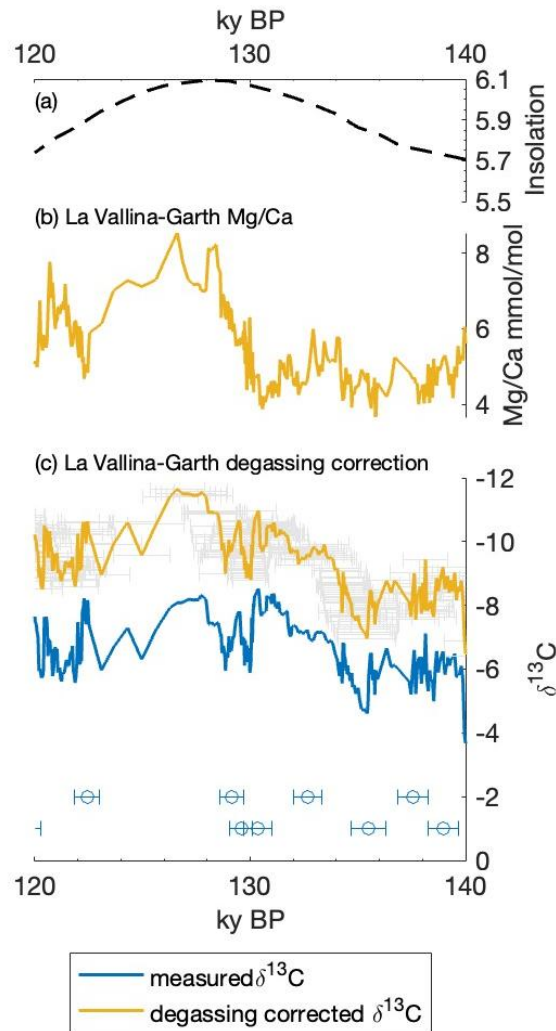

### Termination III

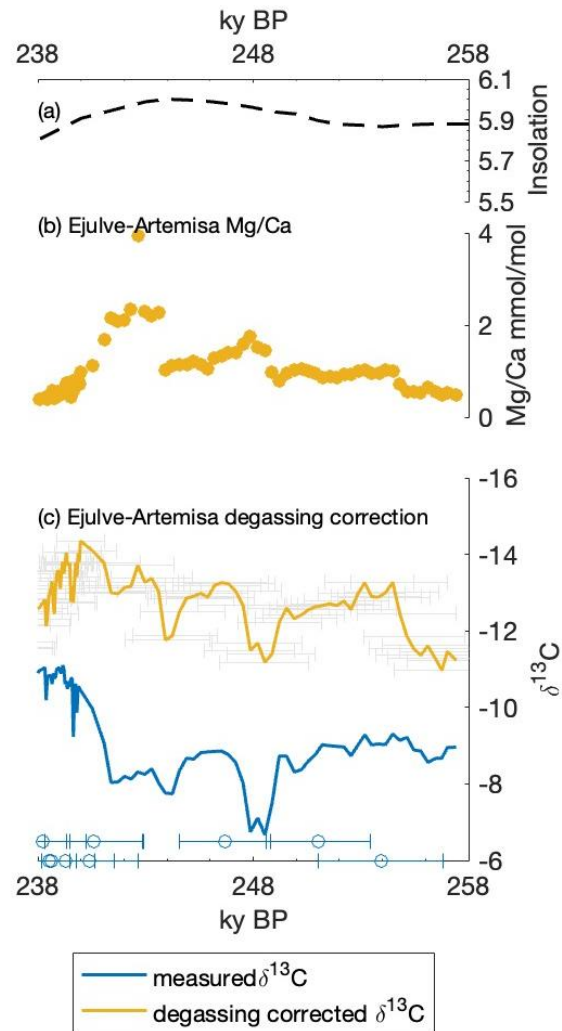

- Badertscher, S., Fleitmann, D., Cheng, H., Edwards, R. L., Göktürk, O. M., Zumbühl, A., Leuenberger, M., and Tüysüz, O.: Pleistocene water intrusions from the Mediterranean and Caspian seas into the Black Sea, *Nat. Geosci.*, 4, 236–239, <https://doi.org/10.1038/ngeo1106>, 2011.
- Bar-Matthews, M., Ayalon, A., Gilmour, M., Matthews, A., and Hawkesworth, C. J.: Sea–land oxygen isotopic relationships from planktonic foraminifera and speleothems in the Eastern Mediterranean region and their implication for paleorainfall during interglacial intervals, *Geochim. Cosmochim. Acta*, 67, 3181–3199, [https://doi.org/10.1016/S0016-7037\(02\)01031-1](https://doi.org/10.1016/S0016-7037(02)01031-1), 2003.
- Cai, Y., Fung, I. Y., Edwards, R. L., An, Z., Cheng, H., Lee, J.-E., Tan, L., Shen, C.-C., Wang, X., Day, J. A., Zhou, W., Kelly, M. J., and Chiang, J. C. H.: Variability of stalagmite-inferred Indian monsoon precipitation over the past 252,000 y, *Proc. Natl. Acad. Sci.*, 112, 2954–2959, <https://doi.org/10.1073/pnas.1424035112>, 2015.
- Cheng, H., Spötl, C., Breitenbach, S. F. M., Sinha, A., Wassenburg, J. A., Jochum, K. P., Scholz, D., Li, X., Yi, L., Peng, Y., Lv, Y., Zhang, P., Votintseva, A., Loginov, V., Ning, Y., Kathayat, G., and Edwards, R. L.: Climate variations of Central Asia on orbital to millennial timescales, *Sci. Rep.*, 6, 36975, <https://doi.org/10.1038/srep36975>, 2016a.
- Cheng, H., Edwards, R. L., Sinha, A., Spötl, C., Yi, L., Chen, S., Kelly, M., Kathayat, G., Wang, X., Li, X., Kong, X., Wang, Y., Ning, Y., and Zhang, H.: The Asian monsoon over the past 640,000 years and ice age terminations, *Nature*, 534, 640–646, <https://doi.org/10.1038/nature18591>, 2016b.
- Columbu, A., Spötl, C., De Waele, J., Yu, T.-L., Shen, C.-C., and Gázquez, F.: A long record of MIS 7 and MIS 5 climate and environment from a western Mediterranean speleothem (SW Sardinia, Italy), *Quat. Sci. Rev.*, 220, 230–243, <https://doi.org/10.1016/j.quascirev.2019.07.023>, 2019.
- Frumkin, A., Ford, D. C., and Schwarcz, H. P.: Continental Oxygen Isotopic Record of the Last 170,000 Years in Jerusalem, *Quat. Res.*, 51, 317–327, <https://doi.org/10.1006/qres.1998.2031>, 1999.
- Kathayat, G., Cheng, H., Sinha, A., Spötl, C., Edwards, R. L., Zhang, H., Li, X., Yi, L., Ning, Y., Cai, Y., Lui, W. L., and Breitenbach, S. F. M.: Indian monsoon variability on millennial-orbital timescales, *Sci. Rep.*, 6, 24374, <https://doi.org/10.1038/srep24374>, 2016.
- Kelly, M. J., Edwards, R. L., Cheng, H., Yuan, D., Cai, Y., Zhang, M., Lin, Y., and An, Z.: High resolution characterization of the Asian Monsoon between 146,000 and 99,000 years B.P. from Dongge Cave, China and global correlation of events surrounding Termination II, *Palaeogeogr. Palaeoclimatol. Palaeoecol.*, 236, 20–38, <https://doi.org/10.1016/j.palaeo.2005.11.042>, 2006.
- Koltai, G., Spötl, C., Shen, C.-C., Wu, C.-C., Rao, Z., Palcsu, L., Kele, S., Surányi, G., and Bárány-Kevei, I.: A penultimate glacial climate record from southern Hungary, *J. Quat. Sci.*, 32, 946–956, <https://doi.org/10.1002/jqs.2968>, 2017.
- Lachniet, M. S., Denniston, R. F., Asmerom, Y., and Polyak, V. J.: Orbital control of western North America atmospheric circulation and climate over two glacial cycles, *Nat. Commun.*, 5, 3805, <https://doi.org/10.1038/ncomms4805>, 2014.
- Luetscher, M., Moseley, G. E., Festi, D., Hof, F., Edwards, R. L., and Spötl, C.: A Last Interglacial speleothem record from the Sieben Hengste cave system (Switzerland): Implications for alpine paleovegetation, *Quat. Sci. Rev.*, 262, 106974, <https://doi.org/10.1016/j.quascirev.2021.106974>, 2021.
- Moseley, G. E., Spötl, C., Cheng, H., Boch, R., Min, A., and Edwards, R. L.: Termination-II interstadial/stadial climate change recorded in two stalagmites from the north European Alps, *Quat. Sci. Rev.*, 127, 229–239, <https://doi.org/10.1016/j.quascirev.2015.07.012>, 2015.

- Moseley, G. E., Edwards, R. L., Wendt, K. A., Cheng, H., Dublyansky, Y., Lu, Y., Boch, R., and Spötl, C.: Reconciliation of the Devils Hole climate record with orbital forcing, *Science*, 351, 165–168, <https://doi.org/10.1126/science.aad4132>, 2016.
- Pérez-Mejías, C., Moreno, A., Sancho, C., Bartolomé, M., Stoll, H., Cacho, I., Cheng, H., and Edwards, R. L.: Abrupt climate changes during Termination III in Southern Europe, *Proc. Natl. Acad. Sci.*, 114, 10047–10052, <https://doi.org/10.1073/pnas.1619615114>, 2017.
- Shakun, J. D., Burns, S. J., Clark, P. U., Cheng, H., and Edwards, R. L.: Milankovitch-paced Termination II in a Nevada speleothem?, *Geophys. Res. Lett.*, 38, <https://doi.org/10.1029/2011GL048560>, 2011.
- Stoll, H. M., Cacho, I., Gasson, E., Sliwinski, J., Kost, O., Moreno, A., Iglesias, M., Torner, J., Perez-Mejias, C., Haghipour, N., Cheng, H., and Edwards, R. L.: Rapid northern hemisphere ice sheet melting during the penultimate deglaciation, *Nat. Commun.*, 13, 3819, <https://doi.org/10.1038/s41467-022-31619-3>, 2022.
- Tzedakis, P. C., Crucifix, M., Mitsui, T., and Wolff, E. W.: A simple rule to determine which insolation cycles lead to interglacials, *Nature*, 542, 427–432, <https://doi.org/10.1038/nature21364>, 2017.
- Tzedakis, P. C., Drysdale, R. N., Margari, V., Skinner, L. C., Menviel, L., Rhodes, R. H., Taschetto, A. S., Hodell, D. A., Crowhurst, S. J., Hellstrom, J. C., Fallick, A. E., Grimalt, J. O., McManus, J. F., Martrat, B., Mokeddem, Z., Parrenin, F., Regattieri, E., Roe, K., and Zanchetta, G.: Enhanced climate instability in the North Atlantic and southern Europe during the Last Interglacial, *Nat. Commun.*, 9, 4235, <https://doi.org/10.1038/s41467-018-06683-3>, 2018.
- Wainer, K., Genty, D., Blamart, D., Daëron, M., Bar-Matthews, M., Vonhof, H., Dublyansky, Y., Pons-Branchu, E., Thomas, L., van Calsteren, P., Quinif, Y., and Caillon, N.: Speleothem record of the last 180 ka in Villars cave (SW France): Investigation of a large  $\delta^{18}\text{O}$  shift between MIS6 and MIS5, *Quat. Sci. Rev.*, 30, 130–146, <https://doi.org/10.1016/j.quascirev.2010.07.004>, 2011.
- Wilcox, P. S., Honiat, C., Trüssel, M., Edwards, R. L., and Spötl, C.: Exceptional warmth and climate instability occurred in the European Alps during the Last Interglacial period, *Commun. Earth Environ.*, 1, 1–6, <https://doi.org/10.1038/s43247-020-00063-w>, 2020.
